# Supplementary material
Source: PubMed Central journal article supplement (PMC1949881)

Supplemental Figure S1

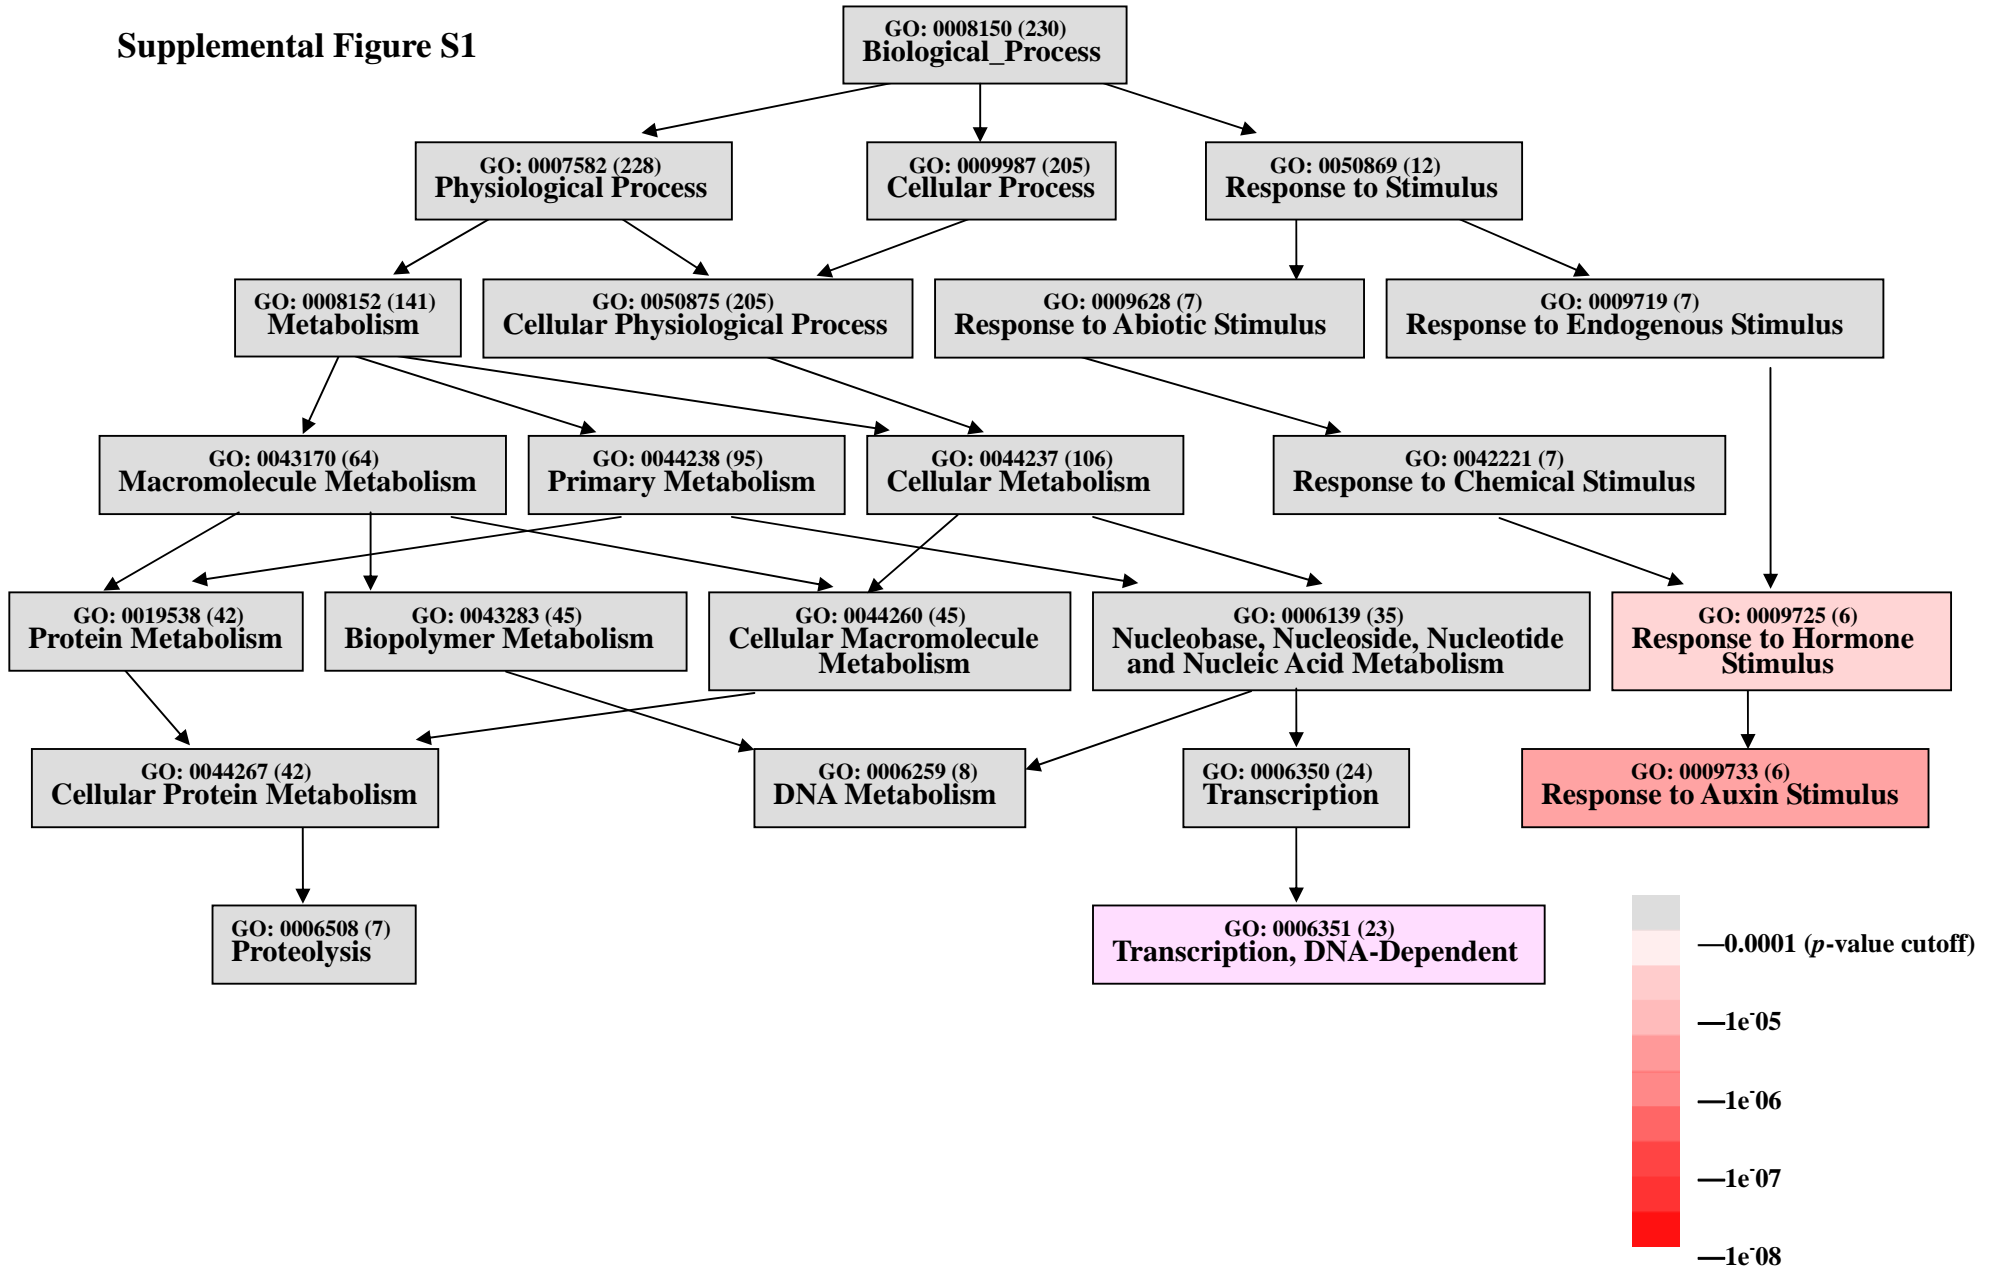

Supplement: plntphys_pp.107.101600_1.pdf [file plntphys_pp.107.101600_1.pdf]
